# Supplementary material for: Potato NAC Transcription Factor StNAC053 Enhances Salt and Drought Tolerance in Transgenic Arabidopsis
Source: PubMed Central journal article supplement (PMC7961516; doi:10.3390/ijms22052568), 2021-03-04
Supplement: ijms-22-02568-s001.pdf [file ijms-22-02568-s001.pdf]

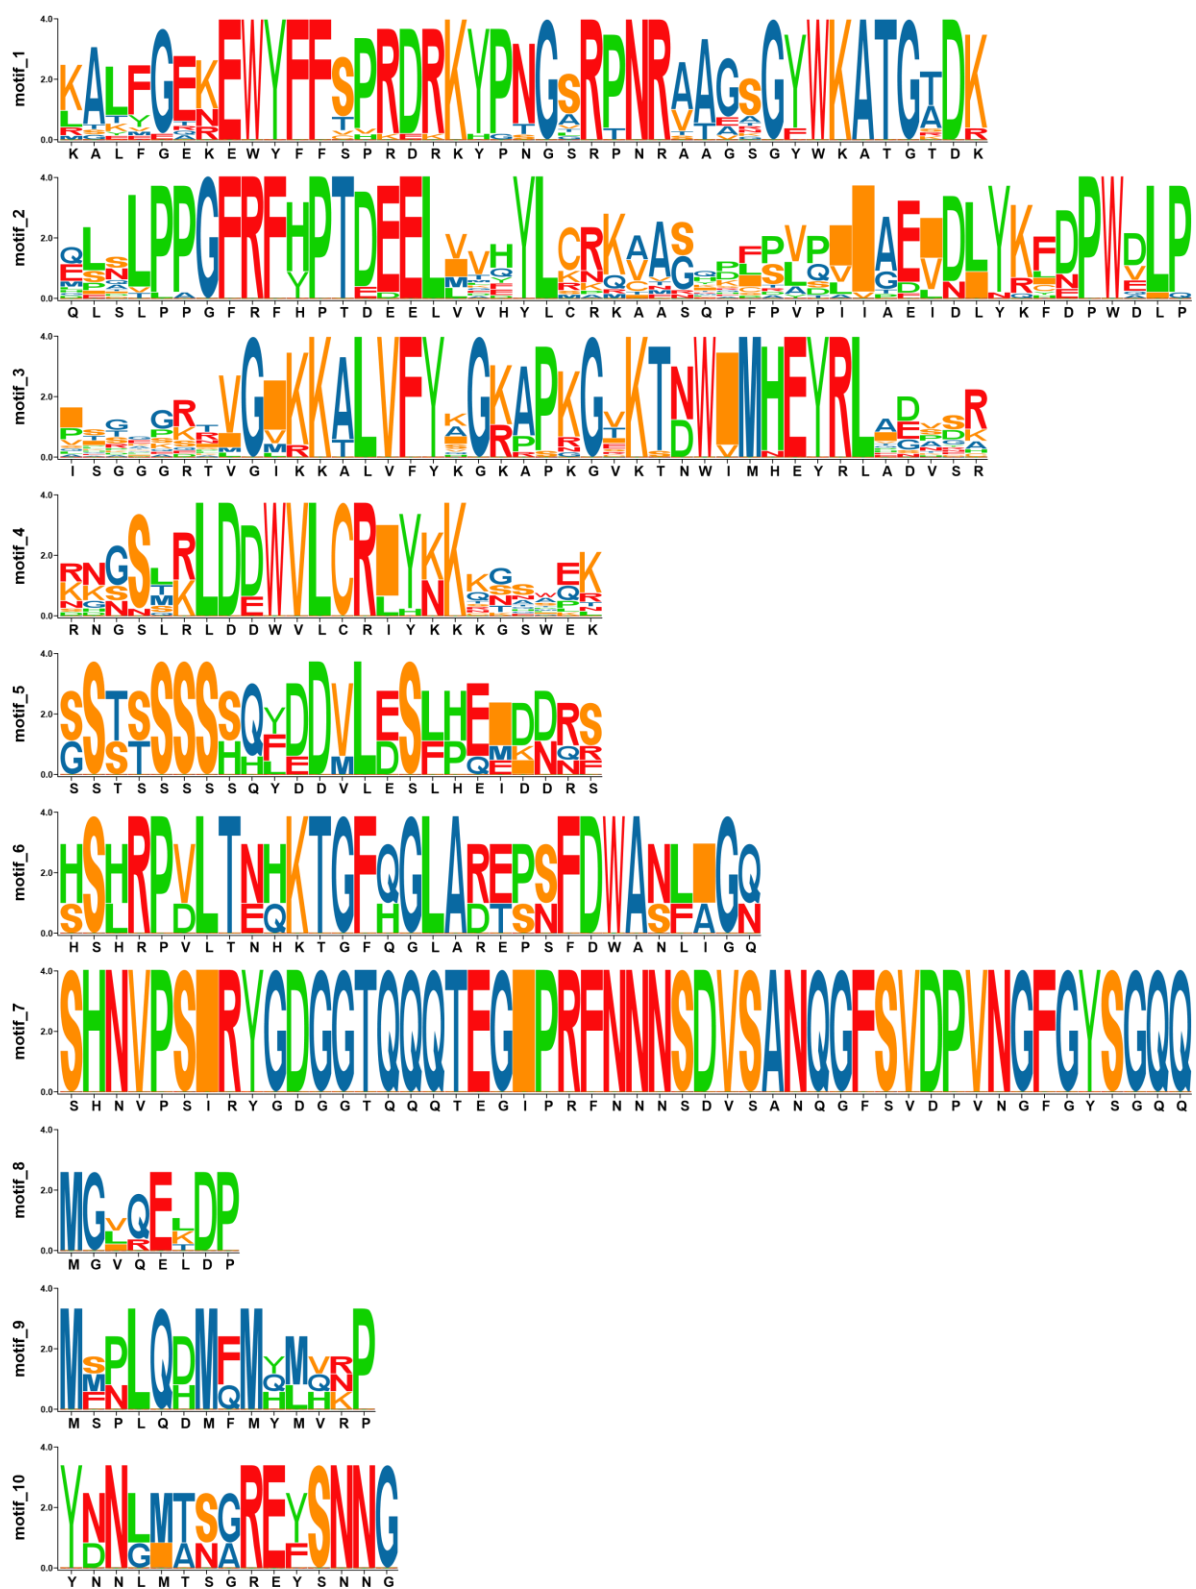

Figure S1: The putative conserved motifs in NAC proteins

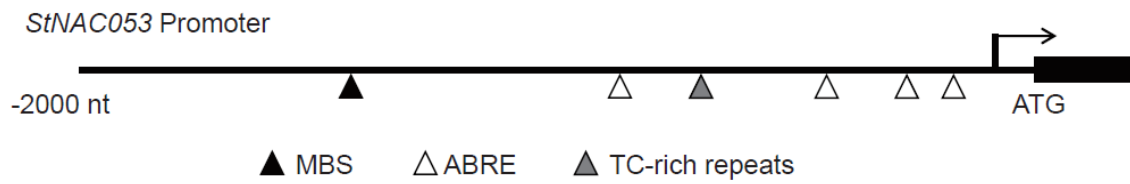

Figure S2 Stress related elements in the promoter regions of *StNAC053* gene

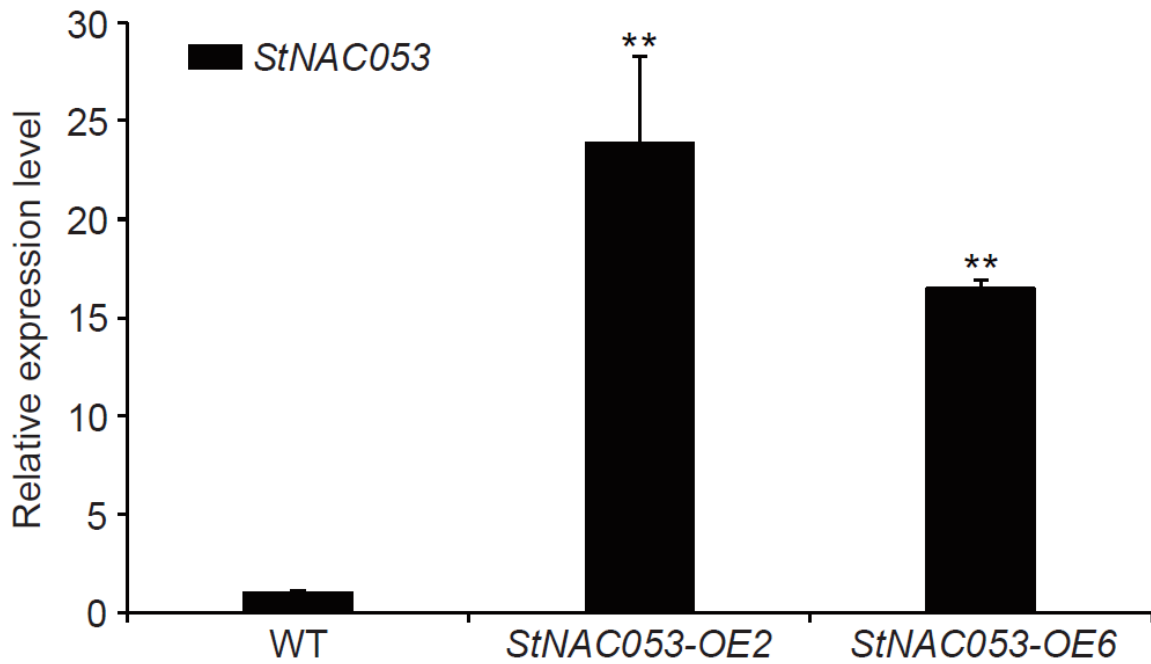

Figure S3 : The expression level of the *StNAC053* gene in wild type and two overexpression lines, the ratios of gene expression levels were calculated relative to the wild type

Table S1 Prediction of NAC binding *cis*-elements in the promoter of stress-responsive genes

| Gene          | NAC protein binding sites | Number |
|---------------|---------------------------|--------|
| <i>COR15A</i> | CACG/CGTA/CACGTG          | 6      |
| <i>DREB1A</i> | CGTA/CGTG/CACG            | 4      |
| <i>ERD11</i>  | CGTG/CACGTG/CACG          | 3      |
| <i>ERF5</i>   | CACG/CGTA/CGTG            | 7      |
| <i>KAT2</i>   | CGTA/CGTG/CACGTG          | 7      |
| <i>RAB18</i>  | CACGTA/CGTA/CGTG/CACG     | 9      |

Table S2 The primers used in this study

|                       |                             |
|-----------------------|-----------------------------|
| <i>StNAC053-CDS-F</i> | 5'-ATGACAGCAGCTGAATTGCAG-3' |
| <i>StNAC053-CDS-R</i> | 5'-TCAAAAAGGTCTGTGCAGGTG-3' |
| <i>StNAC053-qRT-F</i> | 5'-TTCTACCACCGCTACCTCC-3'   |
| <i>StNAC053-qRT-R</i> | 5'-TCGCATGTGAATTCCGGTG-3'   |
| <i>StEF1a_F</i>       | 5'-ATTGGAAACGGATATGCTCCA-3' |
| <i>StEF1a_R</i>       | 5'-TCCTTACCTGAACGCCTGTCA-3' |
| <i>ACTIN2-F</i>       | 5'-TGTGCCAATCTACGAGGGTTT-3' |
| <i>ACTIN2-R</i>       | 5'-TTTCCCGCTCTGCTGTTGT-3'   |
| <i>DREB1A-qRT-F</i>   | 5'-AGGAGACGTTGGTGGAGGCT-3'  |
| <i>DREB1A-qRT-R</i>   | 5'-ACGTCGTCATCATCGCCGTC-3'  |
| <i>ERD11-qRT-F</i>    | 5'-CCCCTTTGGTAAAGTTCC-3'    |
| <i>ERD11-qRT-R</i>    | 5'- ATGTCCTTGCCAGTTGAG-3'   |
| <i>ERF5-qRT-F</i>     | 5'-TTGAAGACGGAACAGAGC-3'    |
| <i>ERF5-qRT-R</i>     | 5'-AGGAGATAACGGCGACAG-3'    |
| <i>RAB18-qRT-F</i>    | 5'-GCATAGACTTTGCTCGGGAGT-3' |
| <i>RAB18-qRT-R</i>    | 5'-CCGCCAGACGAACCTTCA-3'    |
| <i>KAT2-qRT-F</i>     | 5'-TGATAATCCTTCCTGCTT-3'    |
| <i>KAT2-qRT-R</i>     | 5'-CATCATCTATTCTGCGTTT-3'   |
| <i>Cor15A-qRT-F</i>   | 5'-CAGTTCGTCGTCGTTTCT-3'    |
| <i>Cor15A-qRT-R</i>   | 5'-CCAATGTATCTGCGGTTT-3'    |
